# Supplementary material
Source: PubMed Central journal article supplement (PMC7307188)
Supplement: supp_RA119.012079_157326_1_supp_452865_q8xvs0.pdf [file supp_RA119.012079_157326_1_supp_452865_q8xvs0.pdf]

# Supporting Information for

## Optical control of MKK6 reveals divergent roles in pro-apoptotic and anti-proliferative signaling

Shah Md Toufiqur Rahman, Wenyuan Zhou, Alexander Deiters, and Jason M. Haugh

### **This PDF file includes:**

- Fig. S1: No non-specific activation of p38 and JNK signaling following brief UV-light exposure.
- Fig. S2: Time courses of individual cell traces to assess variability in Fig. 2C-F.
- Fig. S3: Photo-activation of MKK6 elicits caspase-3/-7 activity, with no detectable lag.
- Fig. S4: Light-activated MKK6 negatively regulates ERK activity in both cytosol and nucleus.
- Fig. S5: No non-specific perturbation of ERK signaling due to decaging lysine incorporated in the endogenous proteome.
- Fig. S6: Replication of the experiment shown in Fig. 5 B&C using the pan-p38 inhibitor, BIRB 796.
- Fig. S7: Expression of kinase-competent MKK6 elicits p38 activation.
- Fig. S8: Kinase-competent MKK6 suppresses ERK activity.
- Fig. S9: No apparent perturbation of Raf/MEK/ERK phosphorylation cascade by active MKK6.
- Fig. S10: Control experiments for the PBT-2460 melanoma line.
- Fig. S11: Inhibition of MEK/ERK signaling suppresses PBT-2460 cell proliferation.
- Fig. S12: Expression of kinase-active MKK6 elicits cell death.

### Captions for:

- Movie S1 Decaging MKK6 induces p38 signaling and triggers apoptosis.
- Movie S2 Decaging MKK6 triggers cytochrome c release from mitochondria.
- Movie S3 PDGF-stimulated ERK activation measured by ERKKTR biosensor.
- Movie S4 Decaging MKK6 negatively regulates ERK signaling.
- Movie S5 MKK6-mediated regulation of ERK with p38 inhibited.
- Movie S6 MKK6-mediated regulation of ERK in PBT-2460 cells.
- Movie S7 Decaging MKK6 suppresses proliferation of PBT-2460 cells.

**Figure S1**

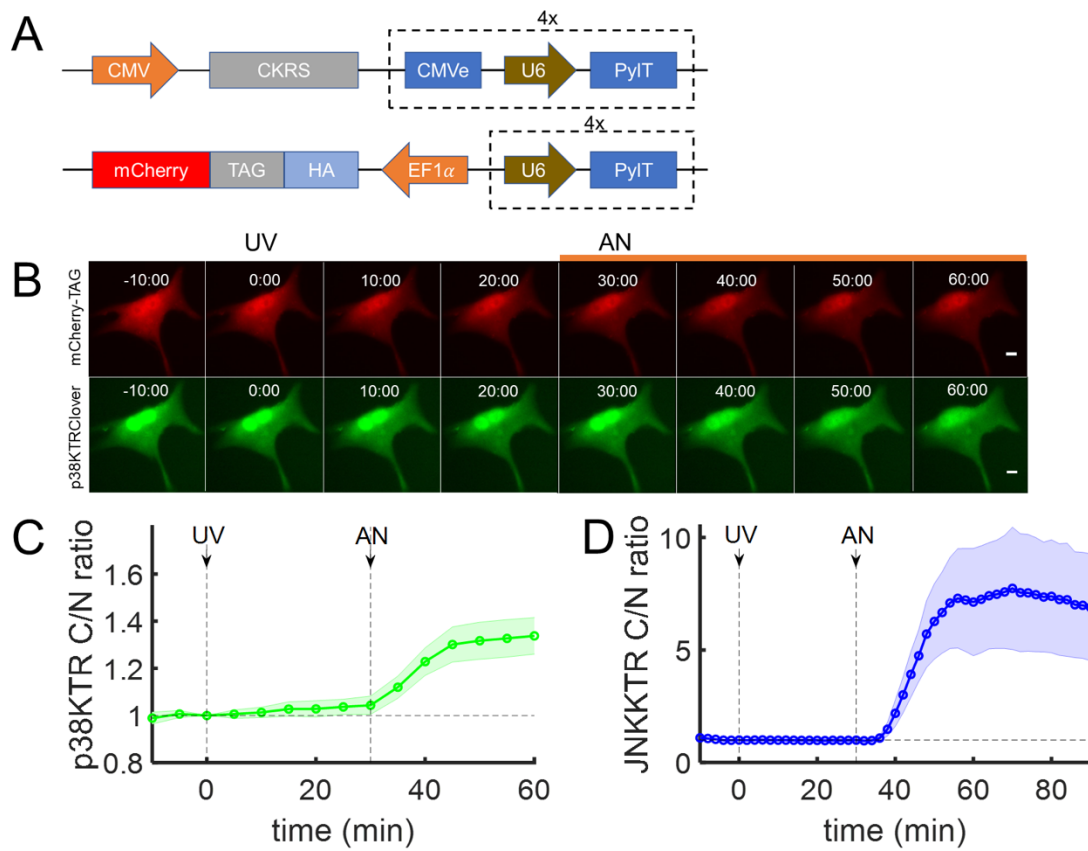

**Fig. S1: No non-specific activation of p38 and JNK signaling following brief UV-light exposure. A)** Plasmids used to express mCherry-tagged with TAG-codon which incorporate the caged lysine using CKRS and pyltRNA pair. **B)** Representative montage showing the expression of mCherry (first row) in a cell transfected with the plasmids in A and p38KTRClover. The cell was first (t = 0 min) irradiated with UV (365 nm, ~2 s), then (t = 30 min) treated with Anisomycin (AN, 50 ng/mL). Scale bar = 10  $\mu$ m, and times are in minutes. **C)** Quantification of p38-kinase activity in cells prepared and treated as in B (mean  $\pm$  95% confidence interval, n = 14). **D)** Cells stably expressing JNK-activity reporter JNKKTRClover were first irradiated with UV-light (365 nm, ~2 s), then treated with Anisomycin (1  $\mu$ g/mL). Quantification of normalized JNK-kinase activity is expressed as mean  $\pm$  95% confidence interval (n = 15).

**Figure S2**

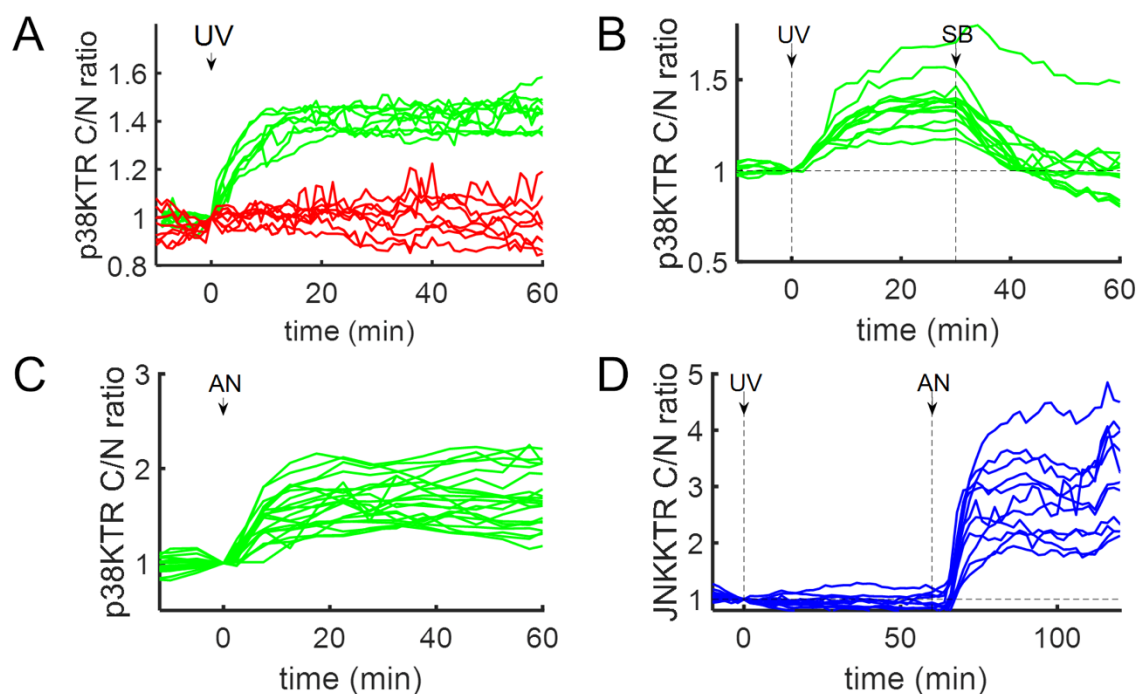

**Fig. S2: Time courses of individual cell traces to assess variability in Fig. 2C-F.** Panels A-D correspond to panels C-F in Fig. 2. **A)** Cells ( $n = 10$  each) were expressing the p38 activity reporter along with caged MKK6 and growth media was supplemented with (green) or without (red) CK (2 mM). **B)** Cells ( $n = 12$ ) were briefly exposed to UV light, then treated with the p38 $\alpha/\beta$ -specific inhibitor SB239063 (10  $\mu$ M). **C)** Analysis of NIH 3T3 cells ( $n = 27$ ) transiently expressing p38KTRClover were treated with anisomycin (50 ng/ml). **D)** NIH 3T3 cells ( $n = 11$ ) co-expressing caged MKK6 and the JNK activity reporter JNKKTRClover were briefly exposed to UV light, then treated with anisomycin (50 ng/ml).

**Figure S3**

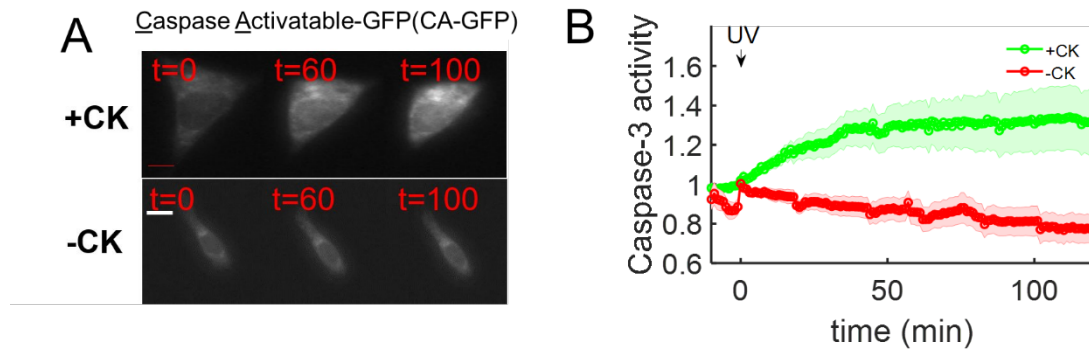

**Fig. S3: Photo-activation of MKK6 elicits caspase-3/-7 activity, with no detectable lag.** **A)** Representative montages of NIH 3T3 cells transiently transfected with plasmids to express caged MKK6 and caspase-3/-7 activity reporter CA-GFP and then cultured in the presence or absence of 2 mM CK. At t = 0, the cells were exposed to UV (365 nm, ~2 s). Scale bar = 10  $\mu$ m, and times shown on the montages are in minutes. **B)** Quantification of the experiments represented in A (mean  $\pm$  95% confidence interval, n = 10 each). Representative of two independent experiments.

**Figure S4**

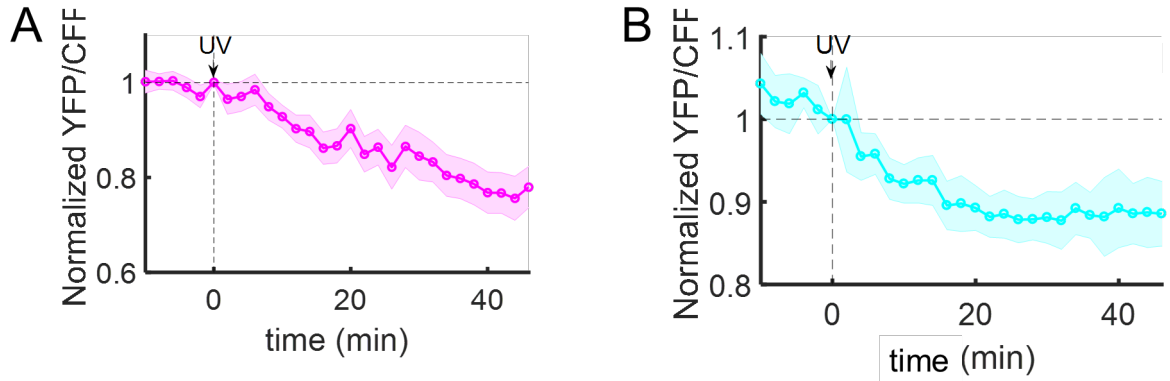

**Fig. S4: Light-activated MKK6 negatively regulates ERK activity in both cytosol and nucleus. A)** NIH 3T3 cells ( $n = 20$ ) were transiently transfected with plasmids to express caged MKK6 along with nuclear ERK-kinase activity reporter Nuclear-EKAR. **B)** NIH 3T3 cells ( $n = 12$ ) were transiently transfected with plasmids to express caged MKK6 and cytosolic ERK-kinase activity reporter Cyto-EKAR. Growth media was supplemented with 2 mM CK. The ERK-kinase activity was monitored before and after UV-irradiation (365nm, ~2s). The solid-line in each curve represents the average kinase activity and shaded regions represent 95% confidence intervals. Representative of two independent experiments.

**Figure S5**

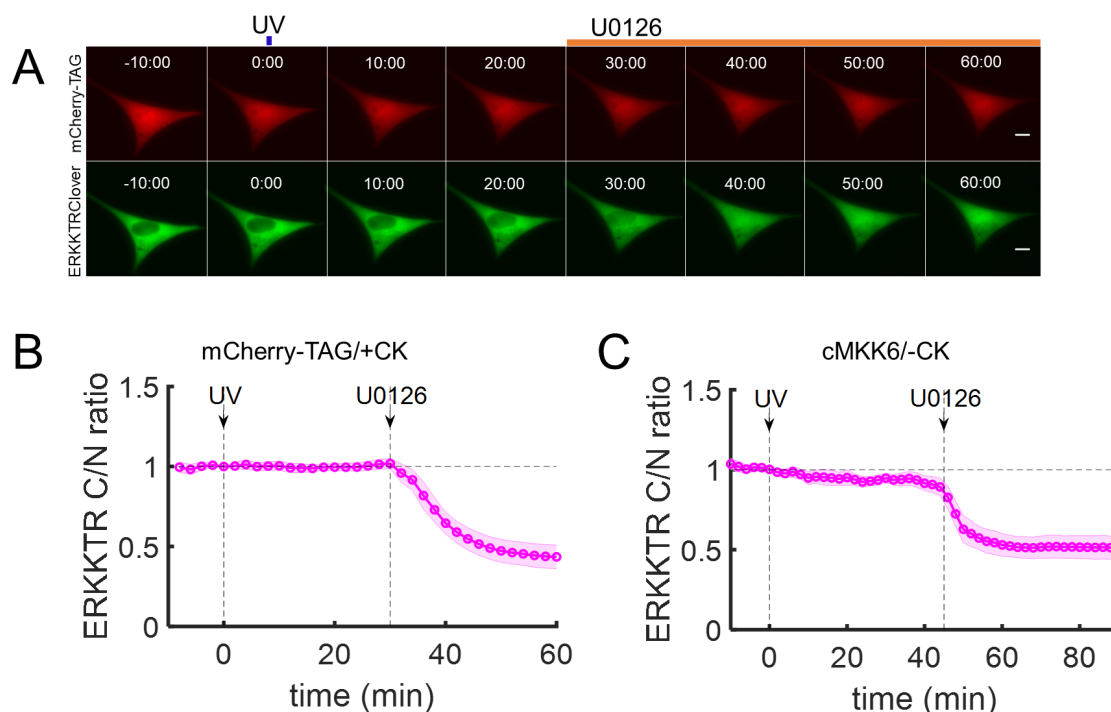

**Fig. S5: No non-specific perturbation of ERK signaling due to decaging lysine incorporated in the endogenous proteome. A)** Representative montage showing the expression of mCherry (first row) in a NIH 3T3 cell transfected with the plasmids in Fig. S1A and ERKKTRClover and incubated with CK. The cell was first ( $t = 0$  min) irradiated with UV (365 nm,  $\sim 2$  s), then ( $t = 30$  min) treated with the MEK inhibitor, U0126 ( $10 \mu\text{M}$ ). Scale bar =  $10 \mu\text{m}$ , and times are in minutes. **B)** Quantification of ERK-kinase activity in cells prepared and treated as in B (mean  $\pm$  95% confidence interval,  $n = 16$ ). **C)** NIH 3T3 cells co-transfected with cMKK6 plasmids and ERKKTRClover, but not incubated with CK, was ( $t = 0$  min) irradiated with UV (365 nm,  $\sim 2$  s), then ( $t = 45$  min) treated with the MEK inhibitor, U0126 ( $10 \mu\text{M}$ ) (mean  $\pm$  95% confidence interval,  $n = 15$ ).

**Figure S6**

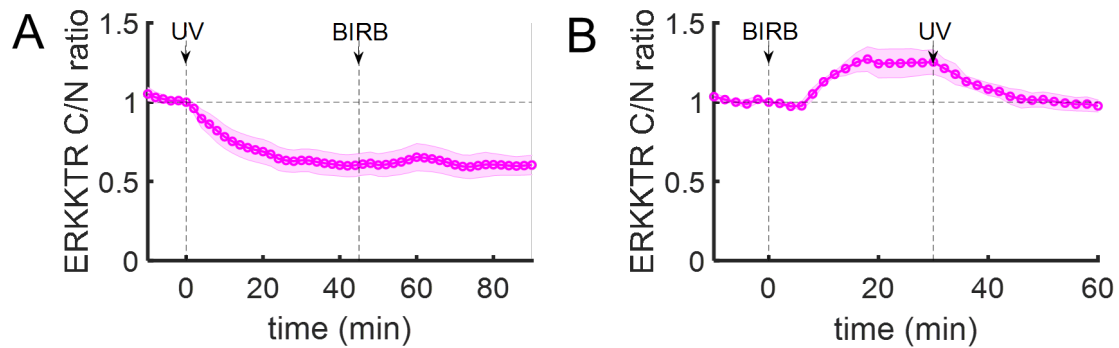

**Fig. S6: Replication of the experiment shown in Fig. 5 B&C using the pan-p38 inhibitor, BIRB 796. A)** NIH 3T3 cells ( $n = 6$ ) expressing caged MKK6 and ERKKTRClover were irradiated with UV (365 nm,  $\sim 2$  s), then treated with pan-p38 inhibitor BIRB 796 ( $10 \mu\text{M}$ ) as indicated. **B)** NIH 3T3 cells ( $n = 13$ ) expressing caged MKK6 and ERKKTRClover were pretreated with BIRB 796, then irradiated with UV (365 nm,  $\sim 2$  s) as indicated. Both plots show mean  $\pm$  95% confidence interval.

**Figure S7**

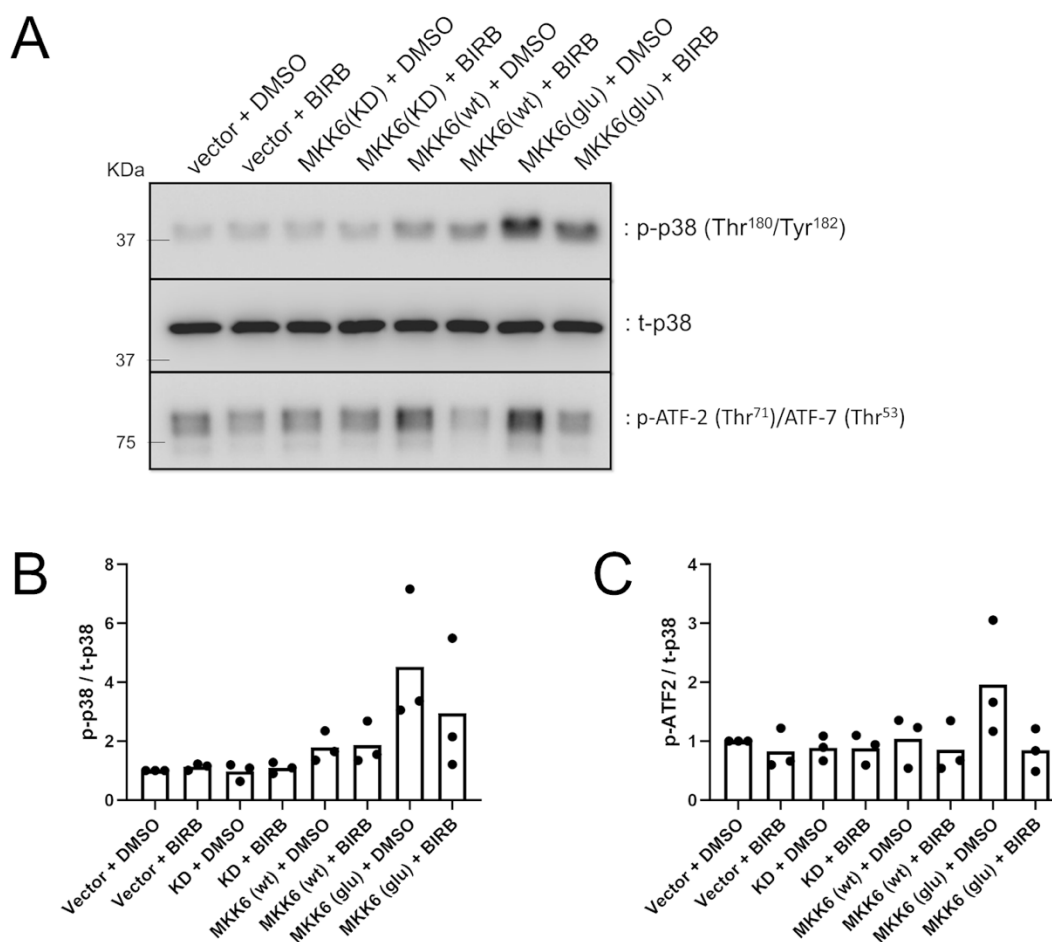

**Fig. S7: Expression of kinase-competent MKK6 elicits p38 activation.** NIH 3T3 cells were transfected with the indicated MKK6 construct (as in Fig. 6) and incubated in 3% FBS and either DMSO vehicle control or BIRB 796 pan-p38 inhibitor (10  $\mu$ M). Lysates were probed with antibodies against phosphorylated p38 (p-p38), total p38 (t-p38), and phosphorylated ATF-2/7 (p-ATF-2/ATF-7). **A**) Immunoblot, representative of three independent experiments. **B & C**) Quantification of p38 (**B**) and ATF-2/7 (**C**) phosphorylation, first normalized by total p38 loading control for each sample, then by the value for the vector + DMSO control. The bars indicate the means of three independent experiments.



**Figure S8**

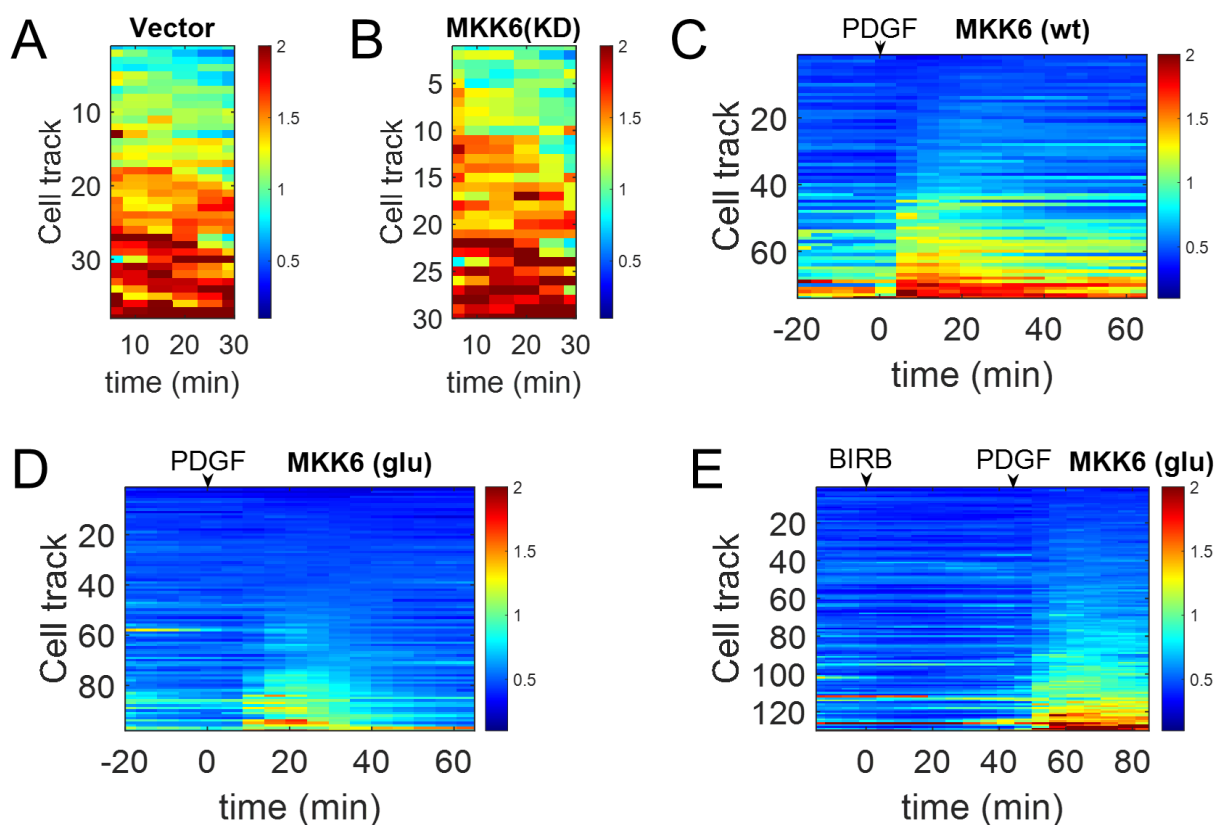

**Fig. S8: Kinase-competent MKK6 suppresses ERK activity.** NIH 3T3 cells were co-transfected with ERKKTR biosensor and the indicated vector control or MKK6 variant. The cells were maintained in 3% FBS to foster ERK activation. Time courses of ERK activity (Cytosol/nucleus ratio of ERKKTR, not normalized) are shown as heat maps, with other treatments are noted above. Co-transfection with matched empty vector (**A**) or kinase-dead (KD) MKK6 (K82A) (**B**) yields normal ERK activity levels. Co-transfection with wild-type MKK6 (**C**) or constitutively active (glu) MKK6 (S207E/T211E) (**D**) results in depressed ERK activity; subsequent stimulation with PDGF fails to restore ERK signaling in most of the cells. along with ERKKTRClover were imaged in presence of 3% FBS were stimulated with PDGF (1nM). **E** In cells co-transfected with MKK6 (glu), inhibition of ERK signaling is not affected by inhibition of p38 (BIRB 796, 10  $\mu$ M).

**Figure S9**

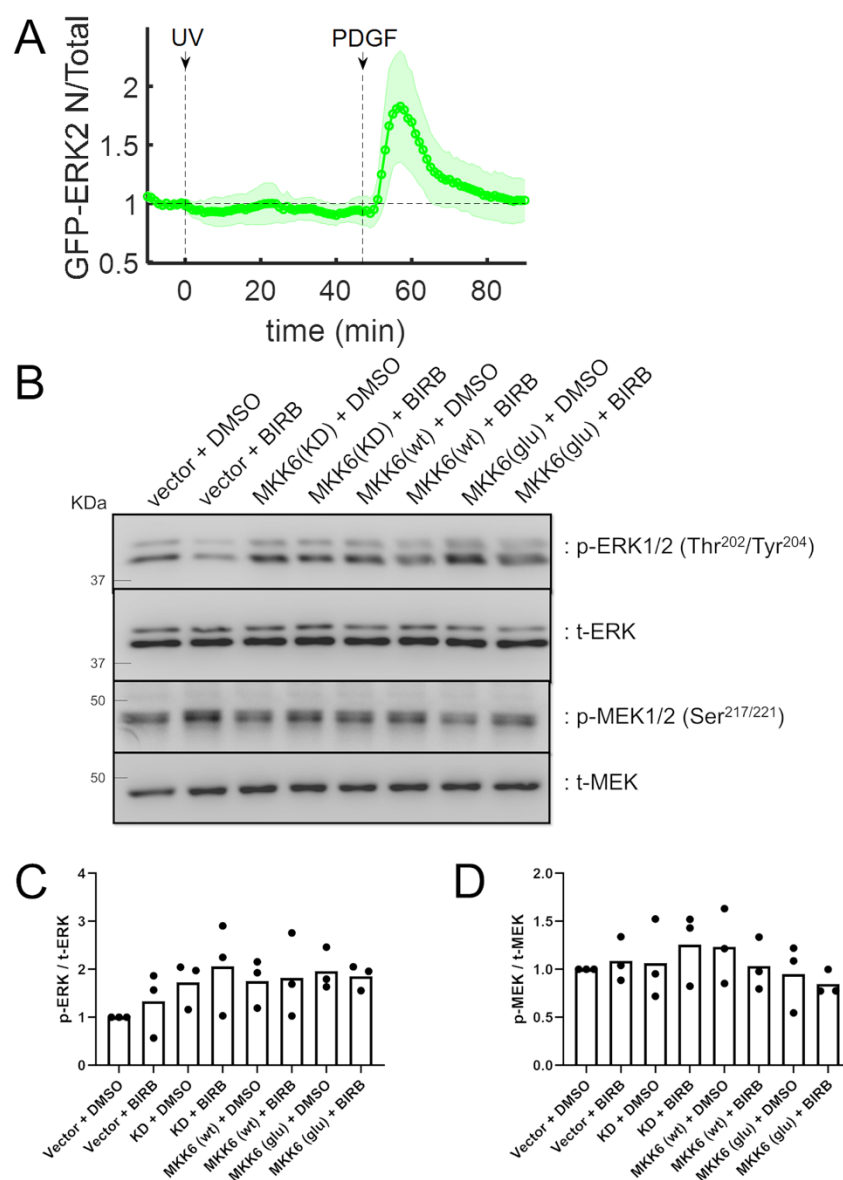

**Fig. S9: No apparent perturbation of Raf/MEK/ERK phosphorylation cascade by active MKK6.** **A)** NIH 3T3 cells expressing caged MKK6 and GFP-ERK2 were treated and imaged as in Fig. 4C. For each image, the ratio of nuclear/total GFP-ERK2 was determined and normalized by the value at time zero. Values are expressed as mean  $\pm$  95% confidence interval ( $n = 7$ ). This is one of two independent experiments performed. **B-D)** The same lysates from Fig. S7 were probed for ERK1/2 and MEK1/2 phosphorylation, with loading controls. **B)** Immunoblot, representative of three independent experiments. **C & D)** Quantification of ERK1/2 (**C**) and MEK1/2 (**D**) phosphorylation, as in Fig. S7 B & C.

**Figure S10**

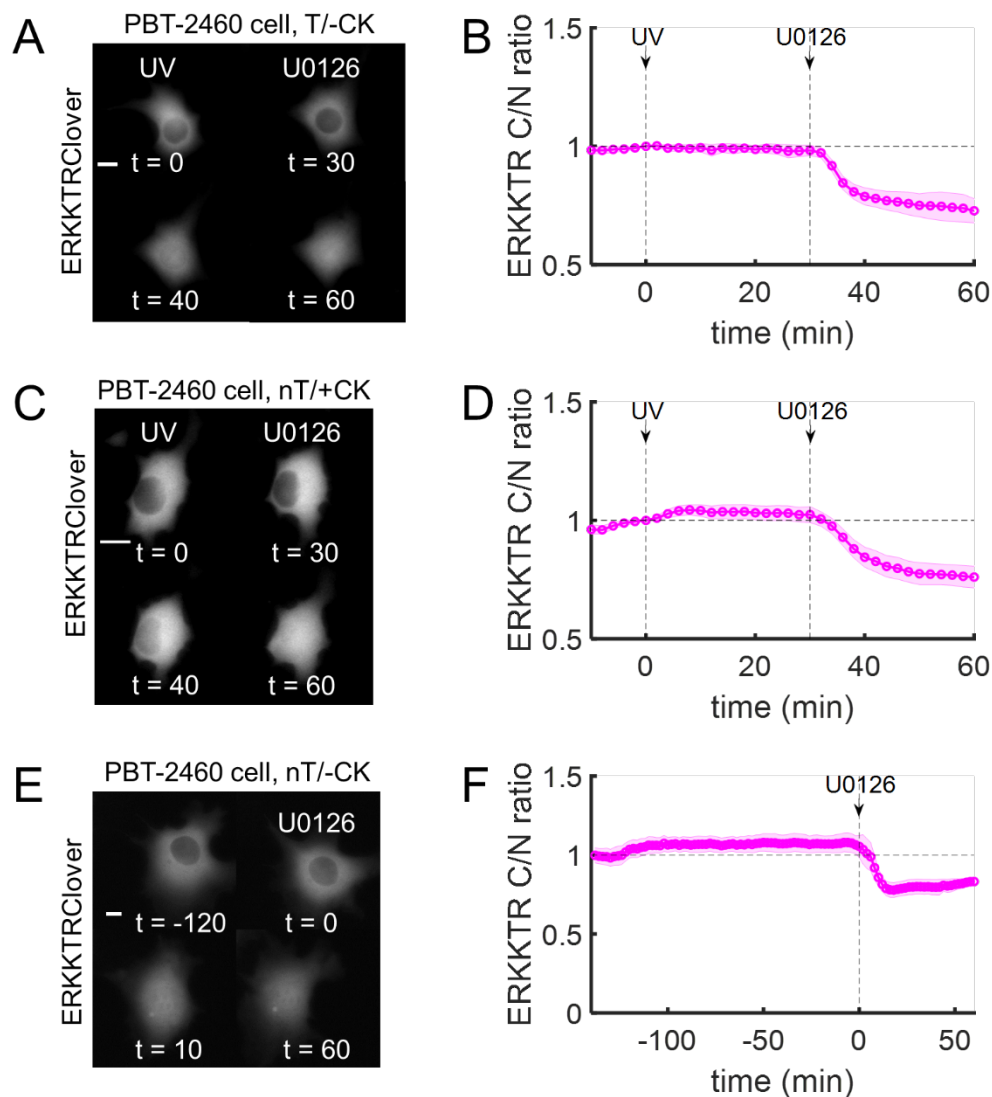

**Fig. S10: Control experiments for the PBT-2460 melanoma line. A&B)** In serum-starved PBT-2460 cells co-expressing the plasmids for caged MKK6 and ERKKTRClover, but with CK withheld ( $n = 14$ ), there is no response to UV exposure (365 nm, ~2s). Subsequent addition of MEK inhibitor U0126 (10  $\mu$ M) confirms that ERK activity was readily reversible. **C&D)** Same as A&B, respectively, without plasmids for caged MKK6 (nT) and with CK in the medium prior to the experiment ( $n = 15$ ). **E&F)** Same as above, but with neither caged MKK6 plasmids nor CK ( $n = 13$ ). In the representative montages shown in A, C, & E, the scale bars = 10  $\mu$ m and all times are in minutes. The plots in B, D, and F show mean  $\pm$  95% confidence interval.

**Figure S11**

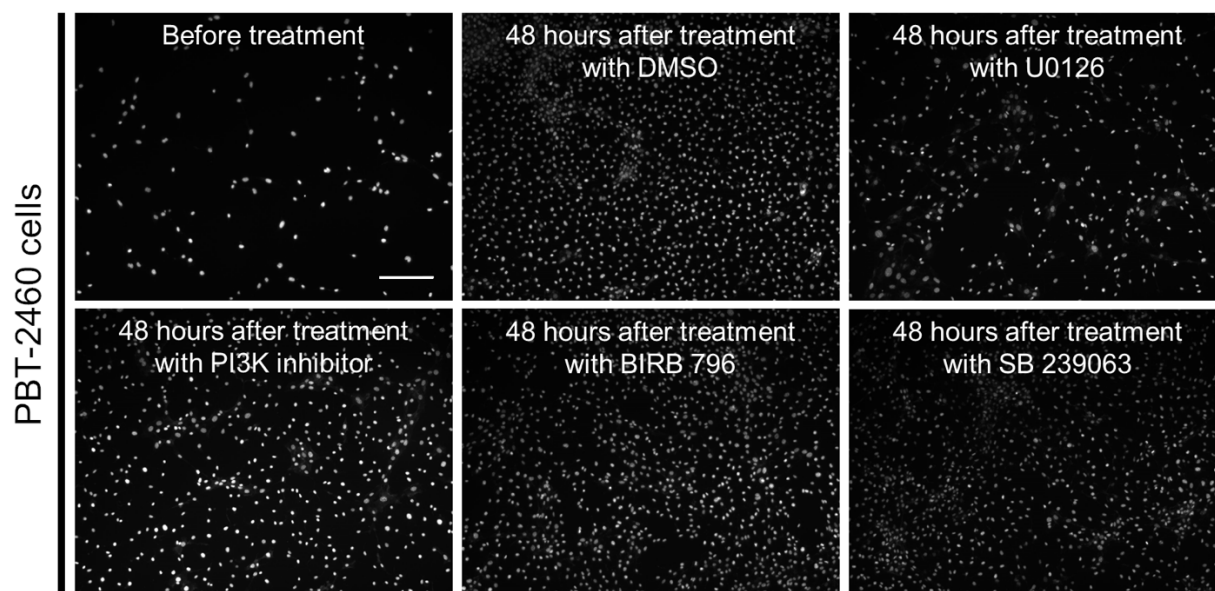

**Fig. S11: Inhibition of MEK/ERK signaling suppresses PBT-2460 cell proliferation.** Representative images of PBT-2460 cells stained with Hoechst 33342 (1  $\mu\text{g}/\text{ml}$ ) before and 48 hours after treatment with DMSO control, MEK1/2 inhibitor U0126 (10  $\mu\text{M}$ ), class 1A PI3K inhibitor IV (3  $\mu\text{M}$ ), BIRB-796 (10  $\mu\text{M}$ ) or SB239063 (10  $\mu\text{M}$ ). Scale bar = 10  $\mu\text{m}$ . These images correspond to the quantification shown in Fig. 7C.

**Figure S12**

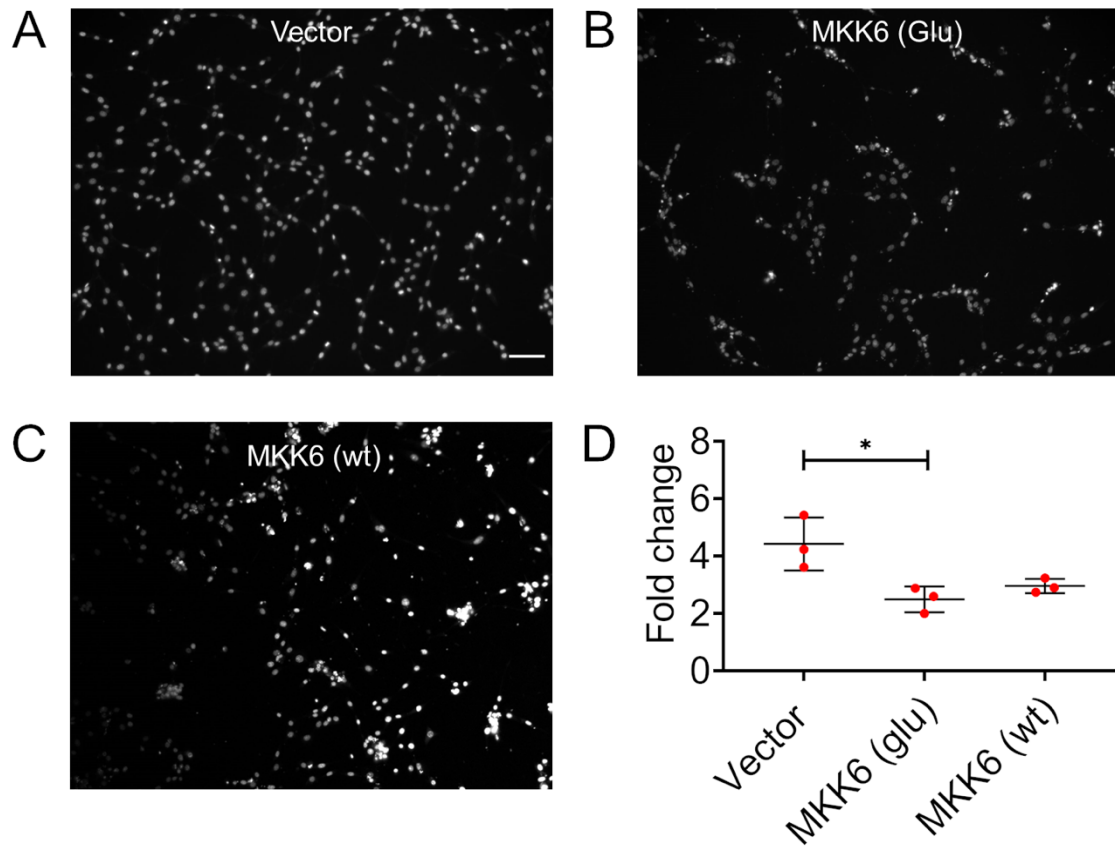

**Fig. S12: Expression of kinase-active MKK6 elicits cell death.** Representative images showing nuclei of NIH 3T3 cells transiently transfected with either empty vector (**A**), constitutively active MKK6 (glu, S207E/T211E) (**B**), or wild-type MKK6 (wt). The cells were maintained in normal growth media; 48 hours after transfection, the cells were stained with Hoechst 33342 (1  $\mu\text{g/ml}$ ). Scale bar = 100  $\mu\text{m}$ . **D**) Quantification of the density of nuclei, relative to a reference plate that was stained at the time the other plates of cells were transfected (mean  $\pm$  S.D.,  $n = 3$  independent experiments). The density of cells expressing MKK6 (glu) was reduced significantly relative to the vector control (\*:  $p < 0.05$ , unpaired  $t$ -test); the density of MKK6 wt-expressing cells was also reduced relative to the control, but its significance did not meet the prescribed level.

## Movie Captions

**Movie S1.** Decaging MKK6 induces p38 signaling and triggers apoptosis. In NIH 3T3 cells expressing caged MKK6 and p38KTRClover, brief UV exposure induces reporter translocation and, ultimately, morphological changes characteristic of apoptosis.

**Movie S2.** Decaging MKK6 triggers cytochrome c release from mitochondria. In NIH 3T3 cells expressing caged MKK6 and cytochrome c-GFP, brief UV exposure triggers, after a variable delay, the release of cytochrome c from mitochondria. Soon after, cells exhibit morphological changes characteristic of apoptosis.

**Movie S3.** PDGF-stimulated ERK activation measured by ERKKTR biosensor. Serum-starved NIH 3T3 cells expressing ERKKTRClover stimulated with 1 nM PDGF-BB, followed by addition of the MEK inhibitor, U0126 (10  $\mu$ M).

**Movie S4.** Decaging MKK6 negatively regulates ERK signaling. In NIH 3T3 cells expressing caged MKK6 and ERKKTRClover, with 3% FBS in the imaging buffer, brief UV exposure induces reporter translocation to the nucleus (indicating loss of ERK activity). Subsequent addition of PDGF does not reverse the localization of ERKKTRClover.

**Movie S5.** MKK6-mediated regulation of ERK with p38 inhibited. In NIH 3T3 cells expressing caged MKK6 and ERKKTRClover, with 3% FBS in the imaging buffer, brief UV exposure induces reporter translocation to the nucleus (indicating loss of ERK activity). Subsequent addition of the p38 inhibitor, SB239063 (10  $\mu$ M), had no discernible effect.

**Movie S6.** MKK6-mediated regulation of ERK in PBT-2460 cells. In serum-starved PBT-2460 cells expressing caged MKK6 and ERKKTRClover, brief UV exposure induces reporter translocation to the nucleus (indicating loss of ERK activity). Subsequent addition of the p38 inhibitor, SB239063 (10  $\mu$ M), had no discernible effect.

**Movie S7.** Decaging MKK6 suppresses proliferation of PBT-2460 cells. In a PBT-2460 cell line with stable expression of ERKKTRClover and transient expression of caged MKK6, and with 3% FBS and amino acids added to the imaging buffer, brief UV exposure induces reporter translocation to the nucleus (indicating loss of ERK activity) in a subset of the cells. None of those cells divided during the 16 h period of observation.
